# Supplementary material for: Post-translational buffering leads to convergent protein expression levels between primates
Source: PubMed Central journal article supplement (PMC6020354; doi:10.1186/s13059-018-1451-z), 2018-06-27
Supplement: 13059_2018_1451_MOESM1_ESM.pdf [file 13059_2018_1451_MOESM1_ESM.pdf]

Table S1 Ribosome profiling data generated for studying species divergence in levels of protein translation.

| <b>ID</b>      | <b>mapped count</b> | <b>proportion &gt; Q30</b> | <b>species</b> |
|----------------|---------------------|----------------------------|----------------|
| <b>C18358</b>  | 7,393,603           | 0.971                      | chimpanzee     |
| <b>C18359</b>  | 15,478,039          | 0.970                      | chimpanzee     |
| <b>C3659</b>   | 20,284,521          | 0.972                      | chimpanzee     |
| <b>CPt91</b>   | 10,079,028          | 0.970                      | chimpanzee     |
| <b>R181-96</b> | 12,599,203          | 0.979                      | rhesus macaque |
| <b>R249-97</b> | 12,040,159          | 0.974                      | rhesus macaque |
| <b>R265-95</b> | 12,063,859          | 0.979                      | rhesus macaque |
| <b>R290-96</b> | 10,491,523          | 0.977                      | rhesus macaque |
| <b>H19127</b>  | 8,984,640           | 0.977                      | human          |
| <b>H19137</b>  | 9,754,058           | 0.977                      | human          |
| <b>H19144</b>  | 12,835,528          | 0.974                      | human          |
| <b>H19147</b>  | 14,949,479          | 0.977                      | human          |

\* mapped count: total number of uniquely mapped reads for each sample after removing rRNA, tRNA and snoRNA reads.

\* proportion > Q30: proportion of sequencing reads that have a Phred quality score greater than 30.

Table S2 Enrichment of nonsynonymous substitutions in post-translationally buffered genes.

|              | <b>HvC.cor</b> | <b>HvC.p.value</b> | <b>RvC.cor</b> | <b>RvC.p.value</b> | <b>RvH.cor</b> | <b>RvH.p.value</b> |
|--------------|----------------|--------------------|----------------|--------------------|----------------|--------------------|
| <b>Ka</b>    | -              | 0.93               | -              | 0.17               | +              | 0.63               |
| <b>Ka/Ks</b> | -              | 0.87               | -              | 0.14               | +              | 0.68               |

\* HvC: human vs. chimpanzee, RvC: rhesus macaque vs. chimpanzee, RvH: rhesus macaque vs. human.

\*cor: direction of correlation, + enrichment, - depletion.

\*p.value: probability of observing the correlation when there is no enrichment in the feature of interest in post-translationally buffered gene identified between each pair of species.

Table S3 Enrichment of protein modifications in post-translationally buffered genes.

| <b>PTM type</b>        | <b>HvC.cor</b> | <b>HvC.p.value</b> | <b>RvC.cor</b> | <b>RvC.p.value</b> | <b>RvH.cor</b> | <b>RvH.p.value</b> |
|------------------------|----------------|--------------------|----------------|--------------------|----------------|--------------------|
| <b>Ubiquitination</b>  | +              | 2.20E-16           | +              | 6.66E-16           | +              | 2.20E-16           |
| <b>Phosphorylation</b> | +              | 2.51E-08           | +              | 1.29E-02           | +              | 4.40E-06           |
| <b>Acetylation</b>     | +              | 2.20E-16           | +              | 7.74E-08           | +              | 2.39E-10           |
| <b>Methylation</b>     | +              | 4.76E-05           | +              | 1.34E-02           | +              | 1.84E-04           |
| <b>Sumoylation</b>     | +              | 3.74E-07           | +              | 1.14E-03           | +              | 2.07E-04           |
| <b>O-GalNAc</b>        | -              | 3.76E-01           | -              | 2.99E-01           | +              | 7.98E-01           |
| <b>O-GlcNAc</b>        | -              | 9.86E-01           | +              | 6.18E-01           | +              | 4.93E-02           |

\* HvC: human vs. chimpanzee, RvC: rhesus macaque vs. chimpanzee, RvH: rhesus macaque vs. human.

\*cor: direction of correlation, + enrichment, - depletion.

\*p.value: probability of observing the correlation when there is no enrichment in the feature of interest in post-translationally buffered gene identified between each pair of species.

Table S4 Enrichment of sub-cellular locations for post-translationally buffered genes.

| SubCellLoc           | NO. of genes associated | HvC.cor | RvC.cor | HvR.cor | HvC.p.value | RvC.p.value | HvR.p.value |
|----------------------|-------------------------|---------|---------|---------|-------------|-------------|-------------|
| <b>Cytoplasm</b>     | 1393 1773               | -       | +       | +       | 3.53E-01    | 6.12E-01    | 9.61E-01    |
| <b>Endoplasmic</b>   | 263 2903                | -       | +       | +       | 1.55E-01    | 2.04E-01    | 7.06E-01    |
| <b>Golgi</b>         | 222 2944                | -       | -       | -       | 2.16E-03    | 2.28E-01    | 1.55E-01    |
| <b>Cytosol</b>       | 136 3030                | -       | -       | -       | 1.96E-01    | 1.50E-02    | 1.87E-01    |
| <b>Nucleus</b>       | 1239 1927               | +       | +       | +       | 1.32E-05    | 3.30E-01    | 5.34E-01    |
| <b>Lysosome</b>      | 64 3102                 | -       | -       | -       | 2.59E-01    | 3.19E-01    | 7.65E-01    |
| <b>Mitochondrion</b> | 426 2740                | -       | -       | -       | 7.03E-03    | 2.30E-04    | 7.20E-02    |
| <b>Peroxisome</b>    | 26 3140                 | -       | -       | -       | 5.92E-01    | 4.41E-01    | 9.96E-01    |
| <b>Membrane</b>      | 232 2934                | -       | -       | +       | 4.24E-02    | 7.37E-01    | 2.88E-01    |
| <b>Endosome</b>      | 112 3054                | -       | -       | -       | 2.01E-02    | 7.26E-02    | 1.06E-02    |
| <b>Secreted</b>      | 55 3111                 | -       | -       | +       | 6.67E-01    | 5.81E-01    | 1.61E-01    |
| <b>P-body</b>        | 24 3142                 | -       | +       | +       | 9.73E-01    | 2.46E-01    | 4.84E-01    |

\* HvC: human vs. chimpanzee, RvC: rhesus macaque vs. chimpanzee, HvR: rhesus macaque vs. human.

\*cor: direction of correlation, + enrichment, - depletion.

\*p.value: probability of observing the correlation when there is no enrichment in the feature of interest in post-translationally buffered gene identified between each pair of species.

Table S5 Enrichment of functional categories for post-translationally buffered genes.

| GO.ID             | Term                                                                 | NO. of genes associated | HvC.fdr  | RvC.fdr  | HvR.fdr  |
|-------------------|----------------------------------------------------------------------|-------------------------|----------|----------|----------|
| <b>GO:0000184</b> | nuclear-transcribed mRNA catabolic process & nonsense-mediated decay | 51 3115                 | 2.29E-13 | 8.13E-13 | 1.52E-13 |
| <b>GO:0003723</b> | RNA binding                                                          | 192 2974                | 5.09E-07 | 2.59E-03 | 1.08E-05 |
| <b>GO:0003735</b> | structural constituent of ribosome                                   | 90 3076                 | 2.11E-09 | 2.09E-03 | 3.73E-10 |
| <b>GO:0006364</b> | rRNA processing                                                      | 107 3059                | 2.29E-13 | 8.80E-06 | 1.52E-13 |
| <b>GO:0006412</b> | translation                                                          | 91 3075                 | 9.45E-08 | 3.77E-05 | 3.92E-10 |
| <b>GO:0006413</b> | translational initiation                                             | 59 3107                 | 2.29E-13 | 2.29E-13 | 1.52E-13 |
| <b>GO:0006614</b> | SRP-dependent cotranslational protein targeting to membrane          | 40 3126                 | 2.29E-13 | 2.29E-13 | 1.52E-13 |
| <b>GO:0015935</b> | small ribosomal subunit                                              | 5 3161                  | 5.08E-05 | 3.19E-06 | 3.07E-03 |
| <b>GO:0019083</b> | viral transcription                                                  | 54 3112                 | 2.29E-13 | 2.29E-13 | 1.52E-13 |
| <b>GO:0022625</b> | cytosolic large ribosomal subunit                                    | 23 3143                 | 2.29E-13 | 1.26E-04 | 1.52E-13 |
| <b>GO:0022627</b> | cytosolic small ribosomal subunit                                    | 13 3153                 | 1.46E-04 | 2.29E-13 | 1.52E-13 |
| <b>GO:0030529</b> | ribonucleoprotein complex                                            | 56 3110                 | 6.29E-05 | 7.29E-03 | 1.95E-03 |

\* HvC: human vs. chimpanzee, RvC: rhesus macaque vs. chimpanzee, HvR: rhesus macaque vs. human.

\*fdr: False discovery rates (Benjamini-Hochberg) of enrichment in the feature of interest in post-translationally buffered gene identified between each pair of species \* Only GO terms that pass a 1% false discovery rate cutoff are presented.

\* All associations reported in this table are positive correlations (i.e. enrichment)

Table S6 Post-translationally buffered genes have more variable transcript expression levels in an YRI population.

| <b>feature</b>      | <b>HvC.cor</b> | <b>HvC.p.value</b> | <b>RvC.cor</b> | <b>RvC.p.value</b> | <b>HvR.cor</b> | <b>HvR.p.value</b> |
|---------------------|----------------|--------------------|----------------|--------------------|----------------|--------------------|
| <b>RNA.mean</b>     | +              | 2.02E-03           | +              | 5.76E-01           | -              | 7.29E-01           |
| <b>RNA.sd</b>       | +              | 4.47E-07           | +              | 5.44E-05           | +              | 1.50E-07           |
| <b>RNA.TMM.mean</b> | +              | 2.02E-03           | +              | 5.76E-01           | -              | 7.29E-01           |
| <b>RNA.TMM.sd</b>   | +              | 1.17E-06           | +              | 1.05E-04           | +              | 1.29E-06           |
| <b>RNA.QN.mean</b>  | +              | 1.82E-03           | +              | 5.70E-01           | -              | 7.38E-01           |
| <b>RNA.QN.sd</b>    | +              | 1.72E-08           | +              | 1.18E-05           | +              | 2.40E-08           |

\* HvC: human vs. chimpanzee, RvC: rhesus macaque vs. chimpanzee, HvR: rhesus macaque vs. human.

\*cor: direction of correlation, + enrichment, - depletion.

\*p.value: probability of observing the correlation when there is no enrichment in the feature of interest in post-translationally buffered gene identified between each pair of species.

\*mean: average transcript levels across YRI individuals

\*sd: standard deviation of transcript levels across YRI individuals

\*TMM: trimmed-mean normalized

\*QN: quantile normalized

Table S7 Additional ribosome profiling data used for batch effect adjustment and for joint analysis with RNA seq and quantitative mass spec data.

| <b>ID</b>      | <b>mapped count</b> | <b>proportion &gt; Q30</b> | <b>species</b> | <b>batch</b> |
|----------------|---------------------|----------------------------|----------------|--------------|
| <b>C4973</b>   | 14,640,312          | 0.979                      | chimpanzee     | mm8          |
| <b>H18505</b>  | 11,952,124          | 0.919                      | human          | mm1          |
| <b>H18507</b>  | 7,864,959           | 0.947                      | human          | mm1          |
| <b>H18516</b>  | 5,009,693           | 0.923                      | human          | mm1          |
| <b>H19193</b>  | 10,081,244          | 0.919                      | human          | mm1          |
| <b>H19204</b>  | 15,820,298          | 0.975                      | human          | mm2          |
| <b>H19238</b>  | 8,941,143           | 0.984                      | human          | mm7          |
| <b>R150-99</b> | 14,008,661          | 0.978                      | rhesus macaque | mm8          |
| <b>H18909</b>  | 11,532,097          | 0.973                      | human          | mm2          |
| <b>H19099</b>  | 13,030,793          | 0.973                      | human          | mm2          |
| <b>H19143</b>  | 8,312,531           | 0.973                      | human          | mm2          |
| <b>H19201</b>  | 18,731,551          | 0.986                      | human          | mm7          |
| <b>H19210</b>  | 12,817,715          | 0.986                      | human          | mm7          |
| <b>H19223</b>  | 10,814,930          | 0.985                      | human          | mm7          |

\* mapped count: total number of uniquely mapped reads for each sample after removing rRNA, tRNA and snoRNA reads.

\* proportion > Q30: proportion of sequencing reads that have a Phred quality score greater than 30.
